1 **Epidemiological description and analysis of *RdRp*, *E* and *N* genes dynamic**  
2 **by RT-PCR of SARS-CoV-2 in Moroccan population: Experience of the**  
3 **National Reference Laboratory (LNR)-UM6SS**

4 Benrahma houda<sup>1,2\*</sup>, Diawara Idrissa<sup>2,3</sup>, Smyej Imane<sup>2</sup>, Rahoui Jalila<sup>2</sup>, Meskaoui Nida<sup>2</sup>,  
5 Benmessaoud Rachid<sup>2</sup>, Arouro Khadija<sup>2</sup>, Jaras Khadija<sup>2</sup>, Moujid Fatima Zahra<sup>2</sup>, Adam  
6 Zahra<sup>2</sup>, Nahir Salma<sup>2</sup>, Aouzal Zineb<sup>2</sup>, Elguezzar Hajar<sup>2</sup>, Jeddane Leila<sup>2</sup>, Ousti Fadoua<sup>2</sup>, EL  
7 Bakkouri Jalila<sup>2,4</sup>, Nejjari Chakib<sup>5</sup>

8

9 1 - Faculty of Medicine, Mohammed VI University of Health Sciences (UM6SS), Casablanca,  
10 Morocco.

11 2 -National Reference Laboratory, Mohammed VI University of Health Sciences (UM6SS),  
12 Casablanca, Morocco.

13 3- Faculty of Nursing and Allied Health Sciences, Mohammed VI University of Health Sciences  
14 (UM6SS), Casablanca Morocco

15 4-Laboratory of Clinical Immunology, Inflammation and Allergy (LICIA), Faculty of Medicine and  
16 Pharmacy, Hassan II University, Casablanca, Morocco.

17 5-International School of Public Health, Mohammed VI University of Health Sciences (UM6SS),  
18 Casablanca, Morocco.

19 \* Corresponding author: [hbenrahama@um6ss.ma](mailto:hbenrahama@um6ss.ma)

20

21

22

23

24

25

26

27

28

29 **NOTE: This preprint reports new research that has not been certified by peer review and should not be used to guide clinical practice.**

30 **Abstract:**

31 The coronavirus disease 2019 (COVID-19), caused by severe acute respiratory syndrome  
32 coronavirus 2 (SARS-CoV-2), is a new infectious disease that first emerged in Hubei  
33 province, China, in December 2019. On 2 March 2020, the Moroccan Ministry of Health  
34 confirmed the first COVID-19 case in Morocco. The new virus SARS-CoV-2 was identified  
35 in the sample of a Moroccan expatriate residing in Italy. Without a therapeutic vaccine or  
36 specific antiviral drugs, early detection and isolation become essential against novel  
37 Coronavirus.

38 This study aims to analyze the epidemiological profile of the SARS-CoV-2 in Moroccan cases  
39 and to investigate the dynamic of *RdRp*, *N*, and *E* genes in patients from diagnosis until the  
40 recovery.

41 Among 859 COVID-19 RT-PCR tests realized for 376 patients, 187 cases had positive results  
42 COVID-19. 4% were positive with the 3 genes *RdRp*, *N*, and *E*, 40 % with *N* and *E* genes, 3%  
43 with *RdRp* and *N* genes, 31% with only the *RdRp* gene and 22% cases are positives  
44 with *N* gene. The analysis of the Covid-19 genes (*RdRp*, *N*, and *E*) dynamic reveal that more  
45 than 6% stay positive with detection of the *N* and *E* gene, and 14% with the *N* gene after 12  
46 days of treatment.

47 The median period from positive to the first negative Covid-19 RT-PCR tests was  $6.8 \pm 2.24$   
48 days for 44% cases,  $14.31 \pm 2.4$  days for 30%, and  $22.67 \pm 1.21$  days for 4%.

49 This a first description of the Moroccan COVID-19 cases and the analysis of the dynamic of  
50 the *RdRp*, *N*, and *E* genes. The analysis of our population can help to improve in the care of  
51 patients.

52

53 **Keywords:** COVID-19, SARS-CoV-2, *RdRp* gene, *N* gene, *E* gene, RT-PCR, Morocco.

54

55

56

57

58

59

## 60 **1. Introduction**

61 According to the World Health Organization (WHO), the WHO China Country Office was  
62 informed of cases of pneumonia of unknown etiology in Wuhan City, Hubei Province, on  
63 December 31, 2019 [1].

64 The investigations identified a new virus that was closely related to severe acute respiratory  
65 syndrome coronavirus (SARS -CoV) [2]. The novel coronavirus in humans was initially  
66 named as 2019-nCoV [3], and then designated as SARS-CoV-2 by the Coronavirus Study  
67 Group of the International Committee on Taxonomy of Viruses [4]. And WHO announced the  
68 epidemic disease caused by SARS-CoV-2 as coronavirus disease 2019 (COVID-19) [5].

69 On April 28<sup>th</sup>, 2020, 213 countries and territories included Morocco, with more than 2  
70 959 929 confirmed cases and more than 202 733 have died from the rapidly-spreading SARS-  
71 CoV-2 virus [6].

72 On the 2<sup>nd</sup> of March 2020, the Ministry of Health confirmed the first COVID-19 case in  
73 Morocco. The virus was detected in a Moroccan expatriate residing in Italy and who came  
74 from Italy on February 27<sup>th</sup>, 2020. Also, the second case was confirmed by the end of the  
75 same day, involving an 89-year-old woman Moroccan residing in Italy too who had returned  
76 to Morocco on the 25<sup>th</sup> of February 2020. Till the 28<sup>th</sup> of April 2020, 4,246 confirmed cases of  
77 COVID-19 with 163 deaths [7].

78 Among the foremost priorities to facilitate public health interventions in Morocco is a reliable  
79 laboratory diagnosis. For that, the Ministry of Health expands screening tests across the  
80 country as part of the country's preparation to end confinement measurement and to rapidly  
81 evaluate more possible cases. On April 1<sup>st</sup>, 2020, the National Reference Laboratory (LNR) of  
82 Mohammed VI University of Health Sciences (UM6SS), became the fourth laboratory in  
83 Morocco authorized to carry out the biological screening and diagnostics of COVID-19.

84 In acute respiratory infection, RT-PCR is routinely used to detect causative viruses from  
85 respiratory secretions. For ensuring the diagnostic of Covid-19, the LNR has been equipped  
86 with different platforms to performed real-time RT-PCR testing for three targets in the virus:  
87 the envelope (E), the RNA dependent RNA polymerase (RdRp) and the nucleocapsid (N).

88 The coronavirus SARS-CoV-2 genome consists of a leader sequence, ORF1ab encoding  
89 proteins for RNA replication, and genes for non-structural proteins (nps) and structural  
90 proteins [8]. Like other betacoronaviruses, the SARS-CoV-2 genome encodes four major

91 structural proteins. The structural proteins are involved in various viral processes, including  
92 virus particle formation. The structural proteins include spike (S), envelope (E), membrane  
93 protein (M), and nucleoprotein (N), which are common to all coronaviruses [9, 10].

94 To date, no studies exploring the variation of *RdRp*, *N* and *E* genes expression of SARS-CoV-  
95 2 in the patient's specimen. In this study, in first time, we analyses the epidemiological profile  
96 of the SARS-CoV-2 in Moroccan cases and in second time we explored the dynamic of *RdRp*  
97 , *N* and *E* genes in patients from diagnosis until the recovery.

98

## 99 **2. Material and Methods**

### 100 **2.1. Patients and samples**

101 All samples included in this study were routinely tested for the presence of SARS-CoV-2  
102 immediately upon arrival in the National Reference Laboratory (LNR) from the Cheikh  
103 Khalifa International University Hospital, Mohammed VI University of Health Sciences  
104 (UM6SS). In this study, we included a total of 376 patients admitted to hospital between  
105 March 28, 2020, and April 29, 2020.

106 Nasopharyngeal swab samples were collected for extracting SARS-CoV-2 RNA from patients  
107 suspected of having COVID-19 infection. The collected swabs were placed into the transport  
108 tube where includes a universal transporting medium that is room temperature stable (UTM-  
109 RT).

110 The LNR provide a RT-PCR to clinically suspected COVID-19 patients when they were  
111 admitted. Multiple repeat RT-PCR tests were performed during admission in the hospital in a  
112 different period based on national mandatory management guidelines.

### 113 **2.2. RNA extraction**

114 The RNA extraction from nasopharyngeal samples was performed using AccuPrep® Viral  
115 RNA Extraction Kit (Bioneer Corporation, Korea) according to the manufacturer's  
116 instructions. Briefly, swabs were vortexed for 10 second speed followed by extraction from  
117 200 µl of UTM-RT, and all samples were subjected to extraction with an elution volume 50  
118 µl.

119

120

121

122 **2.3.RT-PCR SARS-CoV2 detection**

123 One-Step Reverse Transcription Real-Time polymerase chain reaction (RT-PCR) was used to  
 124 confirm the presence of the SARS-CoV-2 genome by amplification of *RdRp*, E, and N gene.  
 125 For the samples included in this study, we realized the RT-PCR by using GeneFinder™  
 126 COVID-19 Plus RealAmp Kit according to the manufacturer's protocol (OSANG Healthcare  
 127 Co., Ltd, South Korea).

128 The RT-PCR assays were performed on the CFX96 Touch Real-Time PCR Detection System  
 129 (Bio-Rad Laboratories, Inc.). The reaction mixture contains 10 µl of COVID-19 PLUS  
 130 Reaction Mixture, 5µl of COVID-19 PLUS Probe Mixture, and 5µl of sample RNA. Total  
 131 Reaction volume is 20µl per sample.

132 The RT-PCR assays were performed under the following conditions: reverse transcriptional  
 133 reaction at 50 °C for 20 minutes, pre- denaturation at 95 °C for 5 minutes, 45 cycles of  
 134 denaturation at 95 °C for 15 seconds and extending and collecting fluorescence signal at 58  
 135 °C for 60 seconds.

136 The result interpretation was performed according to the manufacturer's protocol (table 1)

137 **Table 1:** Results interpretation of GeneFinder™ COVID-19 Plus RealAmp Kit

| <i>Results Of RT-PCR</i>                                | <i>Ct range</i> |          |          |           |
|---------------------------------------------------------|-----------------|----------|----------|-----------|
|                                                         | <b>RdRp</b>     | <b>E</b> | <b>N</b> | <b>IC</b> |
| COVID-19 Positive                                       | ≤ 43            | ≤ 43     | ≤ 43     | ≤ 35      |
|                                                         | ≤ 43            | ≤ 43     | U.D      | ≤ 35      |
|                                                         | ≤ 43            | U.D      | ≤ 43     | ≤ 35      |
| COVID-19 Positive if RdRp ≤ 43 after the second test    | ≤ 43            | U.D      | U.D      | ≤ 35      |
| COVID-19 Positive if E and N ≤ 43 after the second test | U.D             | ≤ 43     | ≤ 43     | ≤ 35      |
| COVID-19 Positive if N ≤ 43 after the second test       | U.D             | U.D      | ≤ 43     | ≤ 35      |
| Beta coronavirus                                        | U.D             | ≤ 43     | U.D      | ≤ 35      |

|          |     |     |     |           |
|----------|-----|-----|-----|-----------|
| Negative | U.D | U.D | U.D | $\leq 35$ |
|----------|-----|-----|-----|-----------|

138 U.D= undetermined, Ct: Cycle Threshold, IC: Internal Control

## 139 2.4.Statistical analysis

140 Continuous variables were presented as means  $\pm$  standard deviation (SD). For categorical  
141 variables were presented as counts and percentages. P-values less than 0.05 were considered  
142 as statistically significant. All statistical analyses were performed using STATA software,  
143 version 11.0.

## 144 3. Results

### 145 3.1.General characteristics

146 In this study, the total number of Covid-19 RT-PCR assays realized on the 376 included  
147 COVID-19 patients was 859, with 3.7 tests per patient. The mean age was  $46.82 \pm 20.54$  years  
148 old, comprising 55.76 % men and 44.24% women (table 2).

149 Of the 376 patients, 189 (50.3 %) had negative results and 187 (49.7%) had positive results  
150 for Covid-19 RT-PCR tests. In the negative cases, the men present 53.16%, and the women  
151 46.84% (table 2).

152 In the Covid-19 positives cases, the gender distribution is 41.83% women and 58.14% men.

153 Among the Covid-19 positive patients, we identify 129 sporadic and 58 family cases (with  
154 known exposure history). Family with SARS-CoV-2 infection corresponds to 24 families.  
155 The analysis of these families showed that 71% included 2 cases, 21% included 3 cases, 4%  
156 included 4 cases, and 4% included 5 cases,

### 157 3.2.SARS-CoV-2 Genes dynamic

158 The interpretation of the RT-PCR results for the first diagnosis of the three genes *RdRp*, *N*,  
159 and *E* showed that: 4% of cases are positive with the 3 genes *RdRp*, *N*, and *E*. 31% cases are  
160 positive with only the *RdRp* gene, 3% of cases are positive with *RdRp* and *N* gene, 22% cases  
161 are positive with *N* gene, and 40 % with *N* and *E* gene. (tab2)

162 The analysis of the Covid-19 genes *RdRp*, *N*, and *E* dynamic revealed that more than 6% of  
163 the SARS-CoV-2 infected person stay positive with detection of the *N* and *E* gene, and 14%  
164 of the positive patients stay positive with the *N* gene after 12 days the treatment. After more  
165 than 21 days of treatment, the RT-PCR test reveals the persistence of the *N* gene in 4 cases  
166 (3%).

167 From symptoms and positive Covid-19 RT-PCR test to the first negative Covid-19 RT-PCR  
 168 tests, the median period was  $6.8 \pm 2.24$  days for 44% cases.

169 For 30% cases the median period  $14.31 \pm 2.4$  days for. A longer period was identified in 4% of  
 170 cases with a median period of  $22.67 \pm 1.21$  days. For 22% of cases the median period was  
 171  $2.03 \pm 0.88$  days, for these patients the RT-PCR was realized for the first time by other  
 172 reference laboratories (tab2). For all patients with the first negative test for the 3 genes, a  
 173 second RT-PCR test was realized after 24h (table 2).

174 We also investigate the impact of age on the profile of Covid-19 by RT-PCR. The Test of  
 175 homogeneity is carried out by comparing the positive and negative cases for a different range  
 176 of age. A significant association was observed for the over than 64 years old range with  $p =$   
 177  $0.009$  and  $OR = 1.74$ , 95%  $CI = [1.28, 2.33]$ .

178

179 **Table 2:** clinical characteristics of all patients, and gene dynamic in positives cases

| Variable                                                       | All patients          |
|----------------------------------------------------------------|-----------------------|
| <b>Clinical parameters</b>                                     |                       |
| <b>Gender (%)</b>                                              |                       |
| Men                                                            | 55.76                 |
| Women                                                          | 44.24                 |
| <b>Age (mean <math>\pm</math> SD) years</b>                    | $46.82 \pm 20.54$     |
| <b>SARS-CoV-2 RT-PCR assay</b>                                 |                       |
| Total tests                                                    | 859                   |
| Tests/patient                                                  | 3.75 /patient         |
| Positive tests                                                 | 187                   |
| Sporadic positive cases                                        | 129                   |
| Families positive cases                                        | 58                    |
| <b>Onset of symptom to negative test, median period (days)</b> |                       |
| For 44% cases                                                  | $6.8 \pm 2.24$ days   |
| For 30% cases                                                  | $14.31 \pm 2.4$ days  |
| For 22% cases                                                  | $2.03 \pm 0.88$ days  |
| For 4% cases                                                   | $22.67 \pm 1.21$ days |
| <b>Gene dynamic after days treatment (133 cases)</b>           |                       |
| <b>After 12 days</b>                                           |                       |
| Presence <i>N</i> and <i>E</i> gene                            | 16                    |
| Presence <i>N</i> gene                                         | 14                    |
| <b>After 21</b>                                                |                       |
| <i>N</i> gene                                                  | 3                     |

180

181

## 182 **4. Discussion**

183 The current SARS-CoV-2 outbreak is the third epidemic attributed to coronavirus in the 21st  
184 century, and incredibly the number of confirmed SARS-CoV-2 infection has surpassed SARS  
185 and MERS in world wild [1, 11].

186 This is the first scale report from 285 COVID-19 Moroccan patients with 859 samples of RT-  
187 PCR tests for Covid-19 detection. The data of this study is the preliminary analysis of the  
188 Moroccan population analyzed in the LNR which will allow making more in-depth studies of  
189 patients infected by the SARS-CoV-2.

190 After analysis of the cases implicated in our study, we found that the infection was prone to  
191 affect men more than women with different percentages of 55.76% and 44.24% respectively.  
192 This result consistent with many conclusions from different studies [12, 13].

193 Many studies suggested that coronavirus infected older more than young individuals [14]. In  
194 our study, comparing positive and negative cases for a different range of age we found a  
195 significant difference ( $p = 0.009$  and  $OR = 1.74$ , 95%  $CI = [1.28, 2.33]$ ), for the range age  $\geq 64$   
196 years. Various studies confirm our observation which suggests that older individuals are more  
197 likely to be infected by the virus [12, 15]. We can explain the correlation between age and  
198 virus by the presence of higher levels of angiotensin converting enzyme 2 in older people  
199 alveoli which are thought to be a receptor for SARS [16].

200 This study included 129 sporadic and 58 familial cases. Various studies analyses the  
201 mechanism of transmission of SARS-CoV-2, and they confirmed that the Human to Human  
202 transmission via droplets is the main route of transmission within a susceptible population.  
203 But no rule out transmission by asymptomatic carriers [17]. The first cases in Morocco were  
204 traveled from the epidemic region in Italy. And family members who traveled from Europe  
205 were most likely responsible for a familial cluster of COVID-19 once back home. Another  
206 explication of the presence of clusters in our country is the organization of familial activity  
207 (wedding, death ceremonies, etc...), and some industrial activity.

208 The SARS-Cov-2 share similar sequencing characteristics with SARS-CoV and MERS-CoV,  
209 but the analysis of different case series showed that the shedding pattern of the viral nucleic



210 acid of patients infected with SARS-CoV-2 is different from SARS-CoV. In the early stage,  
211 the SARS-CoV had a modest viral load peaked approximately 10 days after symptoms onset.

212 For the SARS-CoV-2, the median duration of the virus in the respiratory sample was 18 days,  
213 and from symptom onset, the peak viral shedding in respiratory specimens of positive cases  
214 occurred after about 10 to days for the SARS-CoV [18, 19]. In our study, we found that the  
215 duration of virus shedding in lower respiratory tract samples was longer than 14 days for 30%  
216 of cases, and peak viral shedding occurred after about two weeks from symptom onset.  
217 Tracing the duration of the virus is very important for effective control and prevention of the  
218 epidemic.

219 Because highly sensitive and specific diagnostic assays are the key to the identification of  
220 cases, contact tracing, for diagnosis of cases with suspected SARS-CoV-2 infection. We  
221 chose to performed detection of unique viral sequences with RT-PCR by using  
222 GeneFinder™ COVID-19 Plus RealAmp Kit (OSANG Healthcare Co., Ltd, South Korea),  
223 which is one of the validated protocols for in vitro diagnostic (CE marked) available on the  
224 market. The RT-PCR assays target the E gene encoding for the envelope protein, which is  
225 common to the Sarbecovirus subgenus, the second specific assay targets the *RdRp* gene  
226 encoding for RNA-dependent RNA polymerase and the third assay target the *N* gene encoding  
227 nucleocapsid protein [20, 21].

228 Based on the RT-PCR tests of positive cases during hospitalization period, we found that after  
229 12 days of treatment, more than 6% of the SARS-CoV-2 infected person stay positive with  
230 the detection of the *N* and *E* gene, and 14% of the positive patients stay positive with  
231 the *N* gene. And only 3% stay positive with the *N* gene after more than 21 days of treatment.

232 To our knowledge, the dynamic of the three SARS-CoV-2 genes was not analyzed before.  
233 The genome SARS-CoV-2 shares similar sequencing characteristics with SARS-CoV and  
234 MERSCoV. Human coronaviruses are positive-sense RNA (30 kb) viruses. Two types of  
235 proteins characterize Human coronavirus, structural (Spike (S), Nucleocapsid (N), Matrix  
236 (M), and Envelope (E)) and non-structural proteins (nsp1 up to nsp16) including the RNA  
237 dependent RNA polymerase (RdRp) (nsp12). The organization of the coronavirus genome is  
238 5'-leader-UTR- replicase-S (Spike)-E (Envelope)-M (Membrane)- N (Nucleocapsid)-3' UTR-  
239 poly (A) tail [22].

240 If we analyze the Coronavirus life cycle, we found that the initial attachment of the virion to  
241 the host cell is initiated by interactions between the S protein and its receptor. Following

242 receptor binding, the virus must next gain access to the host cell cytosol. This is generally  
243 accomplished by acid dependent proteolytic cleavage of S protein [23]. The RdRp is a vital  
244 enzyme for the life cycle of RNA viruses, because the ability of coronavirus to recombine is  
245 tied to the strand switching ability of this protein. Recombination likely plays a prominent  
246 role in viral evolution [23]. For the nucleocapsid (N) protein, the primary function is to  
247 package the viral RNA genome within the viral envelope into a ribonucleoprotein (RNP)  
248 complex called the capsid. Ribonucleocapsid packaging is a fundamental part of viral self-  
249 assembly and replication. Additionally, the N-protein of the SARS-CoV-2 affects host cell  
250 responses and may serve regulatory roles during its viral life cycle [24].

251 In our study, we found that the N gene persists in cases sample with  $Ct \leq 40$  in RT-PCR. To  
252 explain this persistence, different studies showed that the coronavirus N protein is abundantly  
253 produced within infected cells. And these proteins have multiple functions, including binding  
254 to viral RNA to form the ribonucleocapsid and have also been proposed to have roles in virus  
255 replication, transcription, and translation [24]. Also, in Humans cells, N proteins have been  
256 shown to cause deregulation of the cell-cycle, inhibit the production of interferon and induce  
257 apoptosis in serum deprived cells, of all which may have possible pathological consequences  
258 [24, 25].

259

## 260 **5. Conclusion**

261 In summary, this is the first description of the dynamic of *RdRp*, *N*, and *E* genes of the SARS-  
262 CoV-2 virus among COVID-19 positive patients. The study allow us to focus on several  
263 parameters involved in the care of patients We highlighted that the comprehension of  
264 dynamism of these tree genes is an important parameter in the COVID -19 diagnosis. We plan  
265 to include in the second time the clinical parameters and the history of infection, to explain  
266 this dynamic of this infection. A comprehensive understanding of COVID-19 will help to  
267 control the disease.

268

## 269 **Data Availability**

270 All data underlying the results are available as part of the article, and no additional source  
271 data are required.

272

## 273 Declaration of Competing Interest

274 All authors declare that there are no conflicts of interest.

275

276

## 277 References

- 278 1. World Health Organization (WHO). “Coronavirus. Geneva: WHO; 2020” [Accessed 28  
279 april 2020]. Available from: <https://www.who.int/health-topics/coronavirus>.
- 280 2. P. Zhou, XL Yang, XG. Wang et al., “A pneumonia outbreak associated with a new  
281 coronavirus of probable 388 bat origin” *Nature*, vol.579, no. 7798, pp.270-273, 2020
- 282 3. A.E. Gorbalenya, S.C. Baker, R.S. Baric, et al., “The species Severe acute respiratory  
283 syndrome-related coronavirus: classifying 2019-nCoV and naming it SARS-CoV-2”  
284 *Nat Microbiol*, vol.5, no.4, pp. 536–544, 2020.
- 285 4. International Committee on Taxonomy of Virus “Naming the 2019 Coronavirus” 2020  
286 (<https://www.biorxiv.org/content/10.1101/2020.02.07.937862v1>).
- 287 5. WHO,2020 “ naming-the-coronavirus-disease-(covid-2019)-and-the-virus-that-causes-  
288 it”[https://www.who.int/emergencies/diseases/novel-coronavirus-2019/technical](https://www.who.int/emergencies/diseases/novel-coronavirus-2019/technical-guidance/naming-the-coronavirus-disease-(covid-2019)-and-the-virus-that-causes-it)  
289 [guidance/naming-the-coronavirus-disease-\(covid-2019\)-and-the-virus-that-causes-it](https://www.who.int/emergencies/diseases/novel-coronavirus-2019/technical-guidance/naming-the-coronavirus-disease-(covid-2019)-and-the-virus-that-causes-it)
- 290 6. WHO, “Coronavirus disease 2019 (COVID-19) situation report – 63”. *Coronavirus*  
291 *Disease (COVID-2019)*, 2020.
- 292 7. <https://www.sante.gov.ma/Pages/corona.aspx> (Accessed 28 April 2020)
- 293 8. T. Li, Y. Zhang, L. Fu, et al., “siRNA targeting the leader sequence of SARS-CoV  
294 inhibits virus replication”. *Gene Therapy*, vol.12, no.9, pp. 751–761, 2005.
- 295 9. M.A. Marra, S.J. Jones, C.R. Astell,et al., “The genome sequence of the SARS-  
296 associated coronavirus”. *Science*, vol.300, no.7477, pp. 1399–1404, 2003.
- 297 10. Y. Ruan, C.L. Wei, A.E. Ling, et al., “Comparative full-length genome sequence  
298 analysis of 14 SARS coronavirus isolates and common mutations associated with  
299 putative origins of infection”. *The Lancet*, vol. 361, no.361, pp. 1779–1785, 2003.
- 300 11. H. Ge, X. Wang, X. Yuan, et al., “The epidemiology and clinical information about  
301 COVID-19” .*Eur J Clin Microbiol Infect Dis*, vol.9, n.1, pp.29, 2020.
- 302 12. N. Chen, M. Zhou, X. Dong, et al. “Epidemiological and clinical characteristics of 99  
303 cases of 2019 novel coronavirus pneumonia in Wuhan, China: a descriptive study”  
304 *Lancet*, vol.395, no.10223, pp. 507-513, 2020.
- 305 13. AT. Xiao, YX. Tong, C. Gao, et al. “Dynamic profile of RT-PCR findings from 301  
306 COVID-19 patients in Wuhan, China: A descriptive study”. *J Clin Virol*. Vol 11,  
307 pp.127:104346, 2020.
- 308 14. A. Badawi, SG. Ryoo. “Prevalence of comorbidities in the Middle East respiratory  
309 syndrome coronavirus (MERS-CoV): a systematic review and meta-analysis”. *Int J*  
310 *Infect Dis*, vol. 49, pp, 129–33, 2016.
- 311 15. C. Huang, Y. Wang, X. Li, et al. “Clinical features of patients infected with 2019 novel  
312 coronavirus in Wuhan, China”. *Lancet*, vol.395, no. 10223, pp. 497-506, 2020.

- 313 16. Y. Chen, K. Shan, W. Qian. “Asians Do Not Exhibit Elevated Expression or Unique  
314 Genetic Polymorphisms for ACE2, the Cell-Entry Receptor of SARS-CoV-2”. Preprints  
315 2020; 2020020258.
- 316 17. Y. Bai, L. Yao, T. Wei, et al. “Presumed asymptomatic carrier transmission of COVID-  
317 19”. JAMA. 2020 [Epub ahead of print].
- 318 18. IF. Hung, SK. Lau, PC. Woo, et al. “Viral loads in clinical specimens and SARS  
319 manifestations”. Hong Kong Med J, vol.15, no. 9, pp.20-2, 2009.
- 320 19. L. Zhao, BK Jha., A. Wu, et al. “Antagonism of the interferon-induced OASRNase L  
321 pathway by murine coronavirus ns2 protein is required for virus replication and liver  
322 pathology”. Cell Host Microbe, vol.11, no. 11, pp. 607–616, 2012.
- 323 20. M. Ciotti, S. Angeletti, M. Minieri, et al. “COVID-19 Outbreak: An Overview”.  
324 Chemotherapy, vol. 7, pp. 1-9, 2020.
- 325 21. VM. Corman, O. Landt, M. Kaiser, et al. “Detection of 2019 novel coronavirus (2019-  
326 nCoV) by real-time RT-PCR”. Euro Surveill, vol.25, no.3, pp. 2000045, 2020.
- 327 22. L. Zou, F. Ruan, M. Huang, et al. “SARS-CoV-2 Viral Load in Upper Respiratory  
328 Specimens of Infected Patients”. N Engl J Med, vol.382, no.12, pp.1177-9, 2020.
- 329 23. A.R. Fehr, S. Perlman, “Coronaviruses: An Overview of Their Replication and  
330 Pathogenesis”. In: Maier H., Bickerton E., Britton P. (eds) Coronaviruses. Methods in  
331 Molecular Biology, vol 1282. Humana Press, New York, NY, 2015.
- 332 24. R. McBride, M. Van Zyl, B.C. Fielding, “The Coronavirus Nucleocapsid Is a  
333 Multifunctional Protein”. Viruses, vol.6, no.8, pp. 2991-3018, 2014.
- 334 25. I Astuti, Ysrafil. “Severe Acute Respiratory Syndrome Coronavirus 2 (SARS-CoV-2):  
335 An overview of viral structure and host response” .Diabetes Metab Syndr, vol.14, no.4,  
336 pp.407-412, 2020.
